# Supplementary material
Source: HighWire-hosted journal article supplement (https://thorax.bmj.com/content/79/2/179)
Supplement: inline-supplementary-material-2 [file inline-supplementary-material-2.pdf]

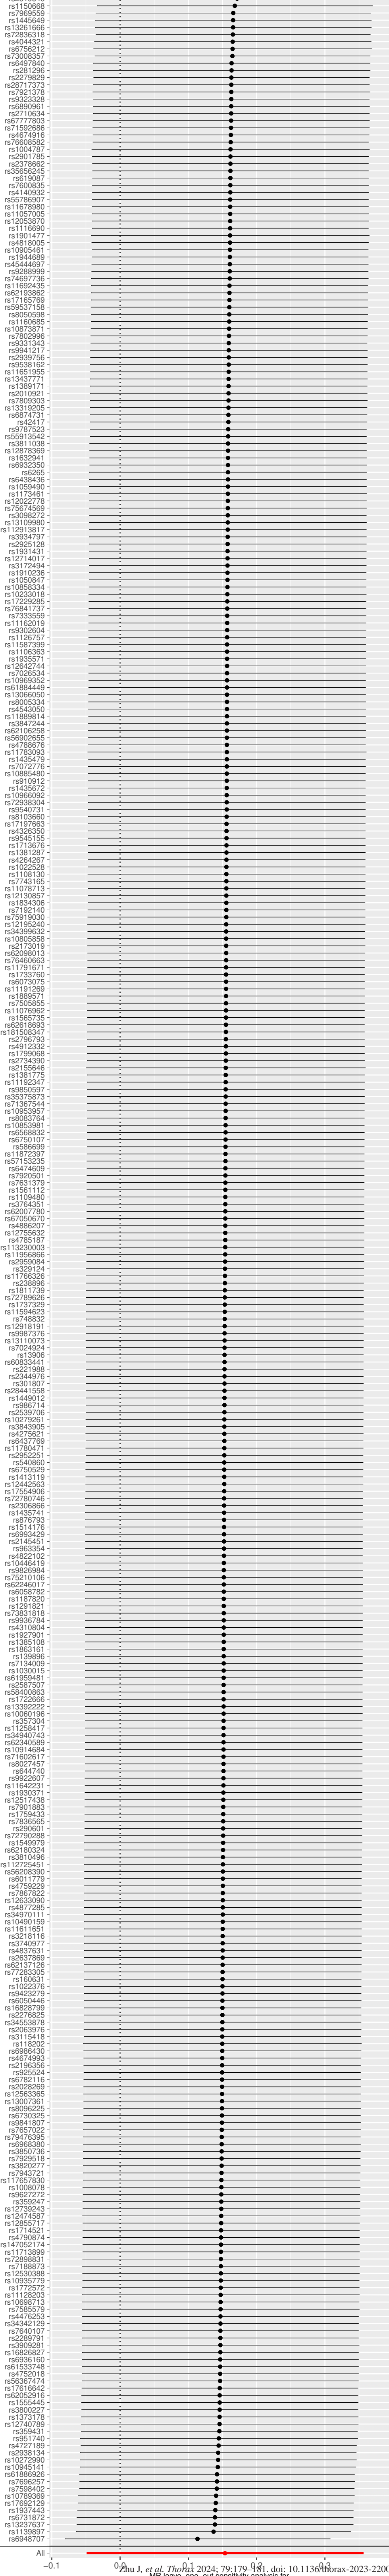

All  
-0.1 0.0 0.1 0.2 0.3  
Zhu J, et al. *Thorax* 2024; 79:179-181. doi: 10.1136/thorax-2023-220012  
MR leave-one-out sensitivity analysis for  
'Smoking initiation' on 'IPF (International IPF Genetics Consortium)'
