# Supplementary material
Source: HighWire-hosted journal article supplement (https://thorax.bmj.com/content/79/2/179)
Supplement: inline-supplementary-material-3 [file inline-supplementary-material-3.pdf]

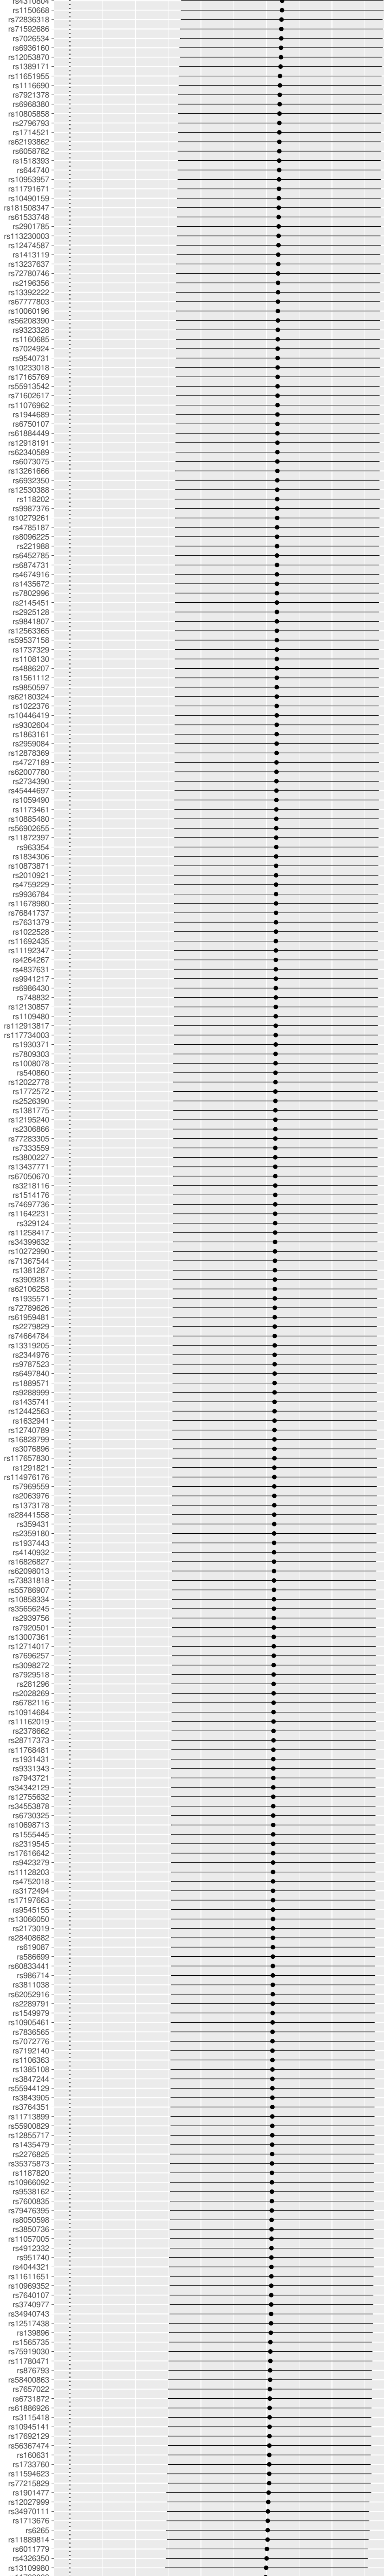

All  
0.0 0.2 0.4 0.6  
Zhu J, et al. *Thorax* 2024; 79:179-181. doi: 10.1136/thorax-2023-220612  
MR leave-one-out sensitivity analysis for  
'Smoking initiation' on 'IPF (Global Biobank Meta-analysis Initiative)'
